# Supplementary material for: Comparison of Extraction Techniques for the Determination of Volatile Organic Compounds in Liverwort Samples
Source: MDPI journal article supplement (doi:10.3390/molecules27092911), 2022-05-03
Supplement: s1 [file s1]

# Comparison of extraction techniques for the determination of volatile organic compounds in liverwort samples

Małgorzata Guzowska <sup>1\*</sup>, Wiesław Wasiak <sup>1</sup> and Rafał Wawrzyniak <sup>1</sup>

**Table S1.** Volatile compounds detected in the samples analysed by SPME and HD

| No. | Compounds                       | RI <sup>a</sup> | RI <sup>b</sup><br>(Lit.) | Code <sup>c</sup> |              |              |
|-----|---------------------------------|-----------------|---------------------------|-------------------|--------------|--------------|
|     |                                 |                 |                           | SPME              | HD1          | HD2          |
| 1   | pentanal                        | <700            | 701                       | 0.11 ± 0.02       | -            | -            |
| 2   | 3-methyl-1-butanol              | 768             | 730                       | 0.01 (*)          | -            | -            |
| 3   | hexanal                         | 834             | 782                       | 0.01 (*)          | -            | -            |
| 4   | 107[M+](8) 91(100) 106(58)      | 902             | -                         | 0.57 ± 0.03       | -            | -            |
| 5   | α-pinene                        | 952             | 939                       | 0.03 ± 0.02       | -            | -            |
| 6   | β-pinene                        | 1004            | 980                       | 0.62 ± 0.02       | -            | -            |
| 7   | limonene                        | 1048            | 1031                      | 0.51 ± 0.01       | -            | -            |
| 8   | benzeneacetaldehyde             | 1093            | 1044                      | 0.19 ± 0.02       | -            | -            |
| 9   | 1-octen-3-yl-acetate            | 1123            | 1111                      | 0.01 ± (*)        | -            | 0.05 ± 0.01  |
| 10  | benzeneethanol                  | 1156            | 1117                      | 0.01 ± (*)        | 0.12 ± 0.02  | 0.25 ± 0.04  |
| 11  | 160[M+](49) 145(100) 117(34)    | 1224            | -                         | 3.89 ± 0.03       | 0.54 ± 0.03  | 0.89 ± 0.03  |
| 12  | β-cyclocitral                   | 1257            | 1220                      | 1.35 ± 0.03       | 0.09 ± 0.02  | 0.13 ± 0.02  |
| 13  | 1,2-dihydro-6-methylnaphthalene | 1295            | 1238                      | 0.02 ± 0.01       | 0.01 ± (*)   | 0.02 ± 0.01  |
| 14  | 207[M+](18) 121(100) 93(71)     | 1332            | -                         | 0.08 ± 0.02       | -            | -            |
| 15  | δ-elemene                       | 1344            | 1339                      | 0.47 ± 0.03       | 0.03 ± 0.01  | 0.04 ± 0.01  |
| 16  | methylnaphthalene               | 1359            | 1359                      | 0.07 ± 0.01       | 0.02 ± 0.01  | 0.03 ± 0.01  |
| 17  | 202[M+](18) 81(100) 96(83)      | 1364            | -                         | 0.07 ± 0.02       | 0.16 ± 0.03  | 0.24 ± 0.04  |
| 18  | anastreptene                    | 1379            | 1379                      | 6.92 ± 0.02       | 14.67 ± 0.06 | 15.74 ± 0.08 |
| 19  | 204[M+](25) 105(100) 161(83)    | 1382            | -                         | 0.48 ± 0.01       | 0.04 ± 0.01  | 0.06 ± 0.01  |
| 20  | 202[M+](5) 159(100) 91(95)      | 1387            | -                         | 0.16 ± 0.02       | 0.01 ± (*)   | -            |
| 21  | 202[M+](5) 143(100) 128(92)     | 1392            | -                         | 1.56 ± 0.02       | 0.02 ± 0.01  | 0.06 ± 0.02  |
| 22  | β-elemene                       | 1405            | 1387                      | 0.38 ± 0.02       | 0.06 ± 0.01  | 0.08 ± 0.02  |
| 23  | 202[M+](2) 143(100) 128(93)     | 1418            | -                         | 0.20 ± 0.02       | -            | -            |
| 24  | α-gurjunene                     | 1423            | 1430                      | 0.19 ± 0.02       | 0.10 ± 0.02  | 0.10 ± 0.03  |
| 25  | 202[M+](2) 145(100) 160(35)     | 1426            | -                         | 0.35 ± 0.02       | -            | -            |
| 26  | β-gurjunene                     | 1431            | 1473                      | 0.15 ± 0.02       | 0.11 ± 0.03  | 0.11 ± 0.03  |
| 27  | 204[M+](12) 159(100) 105(95)    | 1436            | -                         | 0.14 ± 0.02       | -            | -            |
| 28  | (-)-aristolene                  | 1439            | 1428                      | 0.27 ± 0.02       | 0.06 ± 0.01  | 0.06 ± 0.01  |
| 29  | γ-gurjunene                     | 1444            | 1430                      | 0.02 ± 0.01       | 0.12 ± 0.03  | 0.15 ± 0.02  |
| 30  | γ-maaliene                      | 1449            | 1433                      | 0.86 ± 0.01       | 0.08 ± 0.02  | 0.02 ± 0.01  |
| 31  | α-maaliene                      | 1455            | 1442                      | 0.39 ± 0.02       | 0.21 ± 0.04  | 0.18 ± 0.03  |
| 32  | alloaromadendrene               | 1459            | 1452                      | 4.12 ± 0.02       | 0.07 ± 0.01  | 0.05 ± 0.01  |
| 33  | selina-5,11-diene               | 1470            | 1454                      | 0.91 ± 0.02       | 0.13 ± 0.02  | 0.18 ± 0.03  |
| 34  | 202(20)[M]+ 105(100) 159(68)    | 1475            | -                         | 0.15 ± 0.01       | 0.39 ± 0.02  | 0.59 ± 0.05  |
| 35  | 202(30)[M]+ 159(100) 131(75)    | 1479            | -                         | 0.61 ± 0.02       | 0.06 ± 0.01  | 0.05 ± 0.01  |
| 36  | dehydroaromadendrene            | 1482            | 1463                      | 0.65 ± 0.01       | 0.83 ± 0.04  | 1.22 ± 0.06  |
| 37  | 204[M+](1) 142(100) 141(78)     | 1495            | -                         | 0.16 ± 0.02       | 0.61 ± 0.02  | 0.57 ± 0.04  |
| 38  | β-guaiene                       | 1505            | 1473                      | 0.02 ± 0.01       | 0.16 ± 0.02  | 0.27 ± 0.04  |
| 39  | germacrene D                    | 1510            | 1480                      | 3.47 ± 0.03       | 0.44 ± 0.05  | 0.59 ± 0.04  |
| 40  | ledene                          | 1516            | 1487                      | -                 | 0.04 ± 0.01  | 0.13 ± 0.03  |

|                               |                                               |      |      |              |              |              |
|-------------------------------|-----------------------------------------------|------|------|--------------|--------------|--------------|
| 41                            | bicyclogermacrene                             | 1521 | 1500 | 4.39 ± 0.08  | 14.13 ± 0.10 | 14.77 ± 0.07 |
| 42                            | 220[M+](5) 148(100) 133(95)                   | 1525 | -    | 0.18 ± 0.01  | 0.04 ± 0.01  | 0.04 ± 0.01  |
| 43                            | cuparene                                      | 1538 | 1505 | 0.72 ± 0.01  | 1.12 ± 0.03  | 1.41 ± 0.04  |
| 44                            | 204[M+](22) 93(100) 105(68)                   | 1543 | -    | 0.09 ± 0.02  | -            | -            |
| 45                            | 202[M+](12) 157(100) 142(62)                  | 1554 | -    | 0.34 ± 0.02  | 0.31 ± 0.02  | 0.19 ± 0.03  |
| 46                            | 204[M+](18) 155(100) 119(82)                  | 1558 | -    | 0.01 ± (*)   | 0.04 ± 0.01  | 0.03 ± 0.01  |
| 47                            | 200[M+](72) 143(100) 129(93)                  | 1571 | -    | 0.25 ± 0.02  | 0.28 ± 0.03  | 0.37 ± 0.03  |
| 48                            | 200[M+](73) 143(100) 157(97)                  | 1579 | -    | 0.04 ± 0.01  | 0.08 ± 0.02  | 0.1 ± 0.02   |
| 49                            | nerolidol                                     | 1586 | 1583 | 0.34 ± 0.02  | 0.06 ± 0.01  | 0.06 ± 0.01  |
| 50                            | cadina-3,9-diene                              | 1591 | -    | 0.16 ± 0.02  | 0.16 ± 0.02  | 0.01 ± (*)   |
| 51                            | 4,5,9,10-dehydro-isolongifolene               | 1592 | -    | -            | 1.2 ± 0.04   | 0.27 ± 0.03  |
| 52                            | maaliol                                       | 1609 | -    | -            | 1.09 ± 0.03  | 0.13 ± 0.03  |
| 53                            | 1,4-dimethyl-azulene                          | 1616 | -    | 41.89 ± 0.03 | 15.74 ± 0.04 | 18.18 ± 0.06 |
| 54                            | (+)-spathulenol                               | 1619 | -    | -            | 0.90 ± 0.01  | 0.84 ± 0.04  |
| 55                            | (-)-globulol                                  | 1631 | -    | 0.24 ± 0.02  | 0.64 ± 0.03  | 0.61 ± 0.02  |
| 56                            | 220[M+](5) 132(100) 43(96)                    | 1637 | -    | 0.73 ± 0.02  | 0.86 ± 0.02  | 0.72 ± 0.04  |
| 57                            | 202[M+](2) 129(100) 172(72)                   | 1655 | -    | 1.83 ± 0.02  | 5.01 ± 0.04  | 3.39 ± 0.05  |
| 58                            | isospathulenol                                | 1667 | 1631 | 0.33 ± 0.02  | 0.48 ± 0.03  | 0.48 ± 0.02  |
| 59                            | 218[M+](2) 71(100) 57(93)                     | 1674 | -    | 0.39 ± 0.02  | -            | -            |
| 60                            | 220[M+](2) 161(100) 121(39)                   | 1678 | -    | -            | 0.13 ± 0.03  | 0.09 ± 0.02  |
| 61                            | 218[M+](2) 77(100) 182(33)                    | 1684 | -    | -            | 0.09 ± 0.02  | 0.07 ± 0.01  |
| 62                            | 220[M+](5) 129(100) 144(92)                   | 1689 | -    | 0.01 ± (*)   | -            | 0.02 ± 0.01  |
| 63                            | 220[M+](31) 159(100) 105(81)                  | 1695 | -    | 0.27 ± 0.01  | 0.12 ± 0.03  | 0.07 ± 0.01  |
| 64                            | 202[M+](92) 143(100) 128(78)                  | 1710 | -    | 0.03 ± 0.01  | -            | 0.04 ± 0.01  |
| 65                            | 220[M+](11) 109(100) 121(51)                  | 1722 | -    | 0.05 ± 0.01  | 0.92 ± 0.03  | 0.89 ± 0.03  |
| 66                            | 220[M+](13) 159(100) 145(89)                  | 1744 | --   | 0.12 ± 0.02  | 0.45 ± 0.05  | 0.34 ± 0.05  |
| 67                            | 220[M+](6) 161(100) 105(73)                   | -    | -    | -            | 0.15 ± 0.02  | 0.05 ± 0.01  |
| 68                            | 4-(cyclopent-1-enyl)benzoic acid methyl ester | 1784 | -    | 14.89 ± 0.03 | 22.32 ± 0.04 | 23.69 ± 0.04 |
| 69                            | 216[M+](10) 202(100) 159(96)                  | 1791 | -    | 0.12 ± 0.02  | -            | -            |
| 70                            | 216[M+](3) 202(100) 143(81)                   | 1795 | -    | 0.02 ± 0.01  | -            | -            |
| 71                            | germacra-4(15),5,10(14)-trien-1-alpha-ol      | 1801 | -    | 0.41 ± 0.03  | 1.49 ± 0.03  | 1.19 ± 0.03  |
| 72                            | 1,4-dimethyl-7-(1-methylethyl)-azulene        | 1823 | -    | 0.03 ± 0.02  | -            | -            |
| 73                            | methyl 2-methylazulene-1-carboxylate          | 2025 | -    | 0.11 ± 0.02  | 7.59 ± 0.04  | 4.42 ± 0.04  |
| Total                         |                                               |      |      | 98.17 ± 1.09 | 94.58 ± 1.31 | 94.83 ± 1.51 |
| % Identified                  |                                               |      |      | 85.84 ± 0.69 | 84.27 ± 0.88 | 85.96 ± 0.97 |
| Including:                    |                                               |      |      |              |              |              |
| Aliphatics                    |                                               |      |      | 0.14 ± 0.02  | -            | 0.05 ± 0.01  |
| Aromatics                     |                                               |      |      | 15.75 ± 0.10 | 22.47 ± 0.70 | 24.99 ± 0.10 |
| Monoterpene hydrocarbons      |                                               |      |      | 1.16 ± 0.05  | -            | -            |
| Monoterpenoide hydrocarbons   |                                               |      |      | 1.35 ± 0.03  | 0.09 ± 0.20  | 0.13 ± 0.02  |
| Sesquiterpene hydrocarbons    |                                               |      |      | 66.42 ± 0.42 | 50.95 ± 0.64 | 55.25 ± 0.68 |
| Sesquiterpenoide hydrocarbons |                                               |      |      | 1.02 ± 0.08  | 10.76 ± 0.15 | 6.54 ± 0.16  |

\* less than 0.01%. <sup>a</sup> Retention index on Quadex 007-5MS column. <sup>b</sup> NIST 11 library. <sup>c</sup> For abbreviations of samples see Table 1. ± standard deviation

**Table S2.** Volatile compounds detected in the samples extracted by n-hexane

| No. | Compounds                       | RI <sup>a</sup> | Code <sup>b</sup> |                  |                  |
|-----|---------------------------------|-----------------|-------------------|------------------|------------------|
|     |                                 |                 | SLE1-1            | SLE1-2           | SLE1-3           |
| 1   | pentanal                        | <700            | -                 | -                | -                |
| 2   | 3-methyl-1-butanol              | 768             | -                 | -                | -                |
| 3   | hexanal                         | 834             | -                 | -                | -                |
| 4   | 107[M+](8) 91(100) 106(58)      | 902             | -                 | -                | -                |
| 5   | $\alpha$ -pinene                | 952             | -                 | -                | -                |
| 6   | $\beta$ -pinene                 | 1004            | -                 | -                | -                |
| 7   | limonene                        | 1048            | -                 | -                | -                |
| 8   | benzeneacetaldehyde             | 1093            | -                 | -                | -                |
| 9   | 1-octen-3-yl-acetate            | 1123            | -                 | -                | -                |
| 10  | benzeneethanol                  | 1156            | -                 | -                | -                |
| 11  | 160[M+](49) 145(100) 117(34)    | 1224            | 0.87 $\pm$ 0.03   | 0.86 $\pm$ 0.04  | 0.95 $\pm$ 0.04  |
| 12  | $\beta$ -cyclocitral            | 1257            | 0.12 $\pm$ 0.02   | 0.08 $\pm$ 0.02  | 0.05 $\pm$ 0.01  |
| 13  | 1,2-dihydro-6-methylnaphthalene | 1295            | -                 | -                | -                |
| 14  | 207[M+](18) 121(100) 93(71)     | 1332            | -                 | 0.07 $\pm$ 0.01  | 0.08 $\pm$ 0.01  |
| 15  | $\delta$ -elemene               | 1344            | -                 | -                | 0.08 $\pm$ 0.01  |
| 16  | methylnaphthalene               | 1359            | -                 | -                | 0.04 $\pm$ 0.01  |
| 17  | 202[M+](18) 81(100) 96(83)      | 1364            | -                 | -                | 0.08 $\pm$ 0.01  |
| 18  | anastreptene                    | 1379            | 6.94 $\pm$ 0.03   | 4.68 $\pm$ 0.04  | 4.68 $\pm$ 0.05  |
| 19  | 204[M+](25) 105(100) 161(83)    | 1382            | -                 | -                | -                |
| 20  | 202[M+](5) 159(100) 91(95)      | 1387            | 1.62 $\pm$ 0.02   | 1.39 $\pm$ 0.03  | 0.95 $\pm$ 0.04  |
| 21  | 202[M+](5) 143(100) 128(92)     | 1392            | -                 | -                | -                |
| 22  | $\beta$ -elemene                | 1405            | 0.17 $\pm$ 0.02   | 0.17 $\pm$ 0.02  | 0.17 $\pm$ 0.02  |
| 23  | 202[M+](2) 143(100) 128(93)     | 1418            | -                 | -                | -                |
| 24  | $\alpha$ -gurjunene             | 1423            | -                 | -                | -                |
| 25  | 202[M+](2) 145(100) 160(35)     | 1426            | -                 | -                | -                |
| 26  | $\beta$ -gurjunene              | 1431            | -                 | -                | -                |
| 27  | 204[M+](12) 159(100) 105(95)    | 1436            | -                 | -                | -                |
| 28  | (-)-aristolene                  | 1439            | -                 | -                | -                |
| 29  | $\gamma$ -gurjunene             | 1444            | -                 | -                | -                |
| 30  | $\gamma$ -maaliene              | 1449            | -                 | -                | -                |
| 31  | $\alpha$ -maaliene              | 1455            | -                 | -                | -                |
| 32  | alloaromadendrene               | 1459            | -                 | -                | -                |
| 33  | selina-5,11-diene               | 1470            | -                 | -                | -                |
| 34  | 202(20)[M]+ 105(100) 159(68)    | 1475            | -                 | 0.08 $\pm$ 0.01  | 0.10 $\pm$ 0.03  |
| 35  | 202(30)[M]+ 159(100) 131(75)    | 1479            | -                 | -                | -                |
| 36  | dehydroaromadendrene            | 1482            | 0.19 $\pm$ 0.03   | 0.29 $\pm$ 0.04  | 0.29 $\pm$ 0.04  |
| 37  | 204[M+](1) 142(100) 141(78)     | 1495            | -                 | -                | -                |
| 38  | $\beta$ -guaiene                | 1505            | -                 | -                | -                |
| 39  | germacrene D                    | 1510            | -                 | -                | -                |
| 40  | ledene                          | 1516            | -                 | -                | -                |
| 41  | bicyclogermacrene               | 1521            | 7.78 $\pm$ 0.04   | 12.01 $\pm$ 0.04 | 13.41 $\pm$ 0.04 |
| 42  | 220[M+](5) 148(100) 133(95)     | 1525            | -                 | -                | -                |
| 43  | cuparene                        | 1538            | 0.16 $\pm$ 0.03   | 0.26 $\pm$ 0.02  | 0.29 $\pm$ 0.04  |
| 44  | 204[M+](22) 93(100) 105(68)     | 1543            | -                 | -                | -                |
| 45  | 202[M+](12) 157(100) 142(62)    | 1554            | -                 | -                | -                |
| 46  | 204[M+](18) 155(100) 119(82)    | 1558            | -                 | -                | -                |
| 47  | 200[M]+ (72) 143(100) 129(93)   | 1571            | -                 | -                | -                |
| 48  | 200[M+](73) 143(100) 157(97)    | 1579            | -                 | -                | -                |
| 49  | nerolidol                       | 1586            | 0.45 $\pm$ 0.03   | 0.38 $\pm$ 0.03  | 0.31 $\pm$ 0.04  |
| 50  | cadina-3,9-diene                | 1591            | -                 | -                | -                |
| 51  | 4,5,9,10-dehydro-isolongifolene | 1592            | 0.27 $\pm$ 0.02   | 0.36 $\pm$ 0.03  | 0.38 $\pm$ 0.04  |
| 52  | maaliol                         | 1609            | -                 | -                | -                |
| 53  | 1,4-dimethyl-azulene            | 1616            | 59.33 $\pm$ 0.14  | 53.53 $\pm$ 0.11 | 48.88 $\pm$ 0.09 |
| 54  | (+)-spathulenol                 | 1619            | -                 | -                | -                |

|                              |                                               |      |              |              |              |
|------------------------------|-----------------------------------------------|------|--------------|--------------|--------------|
| 55                           | (-)-globulol                                  | 1631 | -            | -            | -            |
| 56                           | 220[M+](5) 132(100) 43(96)                    | 1637 | -            | -            | -            |
| 57                           | 202[M+](2) 129(100) 172(72)                   | 1655 | -            | 0.35 ± 0.02  | 0.71 ± 0.04  |
| 58                           | isospathulenol                                | 1667 | -            | 0.04 ± 0.01  | 0.04 ± 0.01  |
| 59                           | 218[M+](2) 71(100) 57(93)                     | 1674 | -            | -            | -            |
| 60                           | 220[M+](2) 161(100) 121(39)                   | 1678 | -            | -            | -            |
| 61                           | 218[M+](2) 77(100) 182(33)                    | 1684 | -            | -            | -            |
| 62                           | 220[M+](5) 129(100) 144(92)                   | 1689 | -            | -            | -            |
| 63                           | 220[M+](31) 159(100) 105(81)                  | 1695 | -            | -            | -            |
| 64                           | 202[M+](92) 143(100) 128(78)                  | 1710 | -            | -            | -            |
| 65                           | 220[M+](11) 109(100) 121(51)                  | 1722 | -            | -            | -            |
| 66                           | 220[M+](13) 159(100) 145(89)                  | 1744 | -            | -            | -            |
| 67                           | 220[M+](6) 161(100) 105(73)                   | -    | -            | -            | -            |
| 68                           | 4-(cyclopent-1-enyl)benzoic acid methyl ester | 1784 | 21.61 ± 0.06 | 23.20 ± 0.04 | 23.30 ± 0.06 |
| 69                           | 216[M+](10) 202(100) 159(96)                  | 1791 | -            | -            | -            |
| 70                           | 216[M+](3) 202(100) 143(81)                   | 1795 | -            | -            | -            |
| 71                           | germacra-4(15),5,10(14)-trien-1- $\alpha$ -ol | 1801 | -            | -            | -            |
| 72                           | 1,4-dimethyl-7-(1-methylethyl)-azulene        | 1823 | -            | -            | -            |
| 73                           | methyl 2-methylazulene-1-carboxylate          | 2025 | -            | 0.18 ± 0.04  | 0.20 ± 0.03  |
| Total                        |                                               |      | 99.51 ± 0.47 | 97.93 ± 0.55 | 95.00 ± 0.66 |
| % Identified                 |                                               |      | 97.02 ± 0.42 | 95.30 ± 0.46 | 92.13 ± 0.49 |
| Including:                   |                                               |      |              |              |              |
| Aliphatics                   |                                               |      | -            | -            | -            |
| Aromatics                    |                                               |      | 21.61 ± 0.06 | 23.20 ± 0.04 | 23.34 ± 0.07 |
| Monoterpene hydrocarbons     |                                               |      | -            | -            | -            |
| Monoterpenoid hydrocarbons   |                                               |      | 0.12 ± 0.02  | 0.08 ± 0.02  | 0.05 ± 0.01  |
| Sesquiterpene hydrocarbons   |                                               |      | 74.84 ± 0.31 | 71.30 ± 0.30 | 68.19 ± 0.33 |
| Sesquiterpenoid hydrocarbons |                                               |      | 0.45 ± 0.03  | 0.60 ± 0.08  | 0.55 ± 0.08  |

<sup>a</sup> Retention index on Quadex 007-5MS column. <sup>b</sup> For abbreviations of samples see Table 1.  $\pm$  standard deviation

**Table S3.** Volatile compounds detected in the samples extracted by diethyl ether

| No. | Compounds                       | RI <sup>a</sup> | Code <sup>b</sup> |                  |                  |
|-----|---------------------------------|-----------------|-------------------|------------------|------------------|
|     |                                 |                 | SLE2-1            | SLE2-2           | SLE2-3           |
| 1   | pentanal                        | <700            | -                 | -                | -                |
| 2   | 3-methyl-1-butanol              | 768             | -                 | -                | -                |
| 3   | hexanal                         | 834             | -                 | -                | -                |
| 4   | 107[M+](8) 91(100) 106(58)      | 902             | -                 | -                | -                |
| 5   | $\alpha$ -pinene                | 952             | -                 | -                | -                |
| 6   | $\beta$ -pinene                 | 1004            | -                 | -                | -                |
| 7   | limonene                        | 1048            | -                 | -                | -                |
| 8   | benzeneacetaldehyde             | 1093            | -                 | -                | -                |
| 9   | 1-octen-3-yl-acetate            | 1123            | -                 | -                | -                |
| 10  | benzeneethanol                  | 1156            | -                 | -                | -                |
| 11  | 160[M+](49) 145(100) 117(34)    | 1224            | 0.81 $\pm$ 0.04   | 1.14 $\pm$ 0.05  | 1.14 $\pm$ 0.03  |
| 12  | $\beta$ -cyclocitral            | 1257            | -                 | -                | -                |
| 13  | 1,2-dihydro-6-methylnaphthalene | 1295            | -                 | -                | -                |
| 14  | 207[M+](18) 121(100) 93(71)     | 1332            | -                 | -                | -                |
| 15  | $\delta$ -elemene               | 1344            | -                 | -                | -                |
| 16  | methylnaphthalene               | 1359            | -                 | -                | -                |
| 17  | 202[M+](18) 81(100) 96(83)      | 1364            | -                 | -                | -                |
| 18  | anastreptene                    | 1379            | 6.82 $\pm$ 0.06   | 8.61 $\pm$ 0.08  | 14.65 $\pm$ 0.05 |
| 19  | 204[M+](25) 105(100) 161(83)    | 1382            | -                 | -                | -                |
| 20  | 202[M+](5) 159(100) 91(95)      | 1387            | -                 | -                | -                |
| 21  | 202[M+](5) 143(100) 128(92)     | 1392            | 0.70 $\pm$ 0.03   | 0.59 $\pm$ 0.03  | 0.31 $\pm$ 0.03  |
| 22  | $\beta$ -elemene                | 1405            | -                 | -                | -                |
| 23  | 202[M+](2) 143(100) 128(93)     | 1418            | -                 | -                | -                |
| 24  | $\alpha$ -gurjunene             | 1423            | -                 | -                | -                |
| 25  | 202[M+](2) 145(100) 160(35)     | 1426            | -                 | -                | -                |
| 26  | $\beta$ -gurjunene              | 1431            | -                 | -                | -                |
| 27  | 204[M+](12) 159(100) 105(95)    | 1436            | -                 | -                | -                |
| 28  | (-)-aristolene                  | 1439            | -                 | -                | -                |
| 29  | $\gamma$ -gurjunene             | 1444            | -                 | -                | -                |
| 30  | $\gamma$ -maaliene              | 1449            | -                 | -                | -                |
| 31  | $\alpha$ -maaliene              | 1455            | -                 | -                | -                |
| 32  | alloaromadendrene               | 1459            | -                 | -                | -                |
| 33  | selina-5,11-diene               | 1470            | -                 | -                | -                |
| 34  | 202(20)[M]+ 105(100) 159(68)    | 1475            | -                 | -                | -                |
| 35  | 202(30)[M]+ 159(100) 131(75)    | 1479            | -                 | -                | -                |
| 36  | dehydroaromadendrene            | 1482            | -                 | -                | -                |
| 37  | 204[M+](1) 142(100) 141(78)     | 1495            | -                 | -                | -                |
| 38  | $\beta$ -guaiene                | 1505            | -                 | -                | -                |
| 39  | germacrene D                    | 1510            | -                 | -                | -                |
| 40  | ledene                          | 1516            | -                 | -                | -                |
| 41  | bicyclogermacrene               | 1521            | 7.38 $\pm$ 0.06   | 10.94 $\pm$ 0.04 | 17.59 $\pm$ 0.05 |
| 42  | 220[M+](5) 148(100) 133(95)     | 1525            | -                 | -                | -                |
| 43  | cuparene                        | 1538            | -                 | -                | -                |
| 44  | 204[M+](22) 93(100) 105(68)     | 1543            | -                 | -                | -                |
| 45  | 202[M+](12) 157(100) 142(62)    | 1554            | -                 | -                | -                |
| 46  | 204[M+](18) 155(100) 119(82)    | 1558            | -                 | -                | -                |
| 47  | 200[M]+ (72) 143(100) 129(93)   | 1571            | -                 | -                | -                |
| 48  | 200[M+](73) 143(100) 157(97)    | 1579            | -                 | -                | -                |
| 49  | nerolidol                       | 1586            | -                 | -                | -                |
| 50  | cadina-3,9-diene                | 1591            | -                 | -                | -                |
| 51  | 4,5,9,10-dehydro-isolongifolene | 1592            | 0.34 $\pm$ 0.04   | 0.22 $\pm$ 0.02  | 0.15 $\pm$ 0.02  |
| 52  | maaliol                         | 1609            | -                 | -                | -                |
| 53  | 1,4-dimethyl-azulene            | 1616            | 47.19 $\pm$ 0.08  | 45.89 $\pm$ 0.08 | 43.52 $\pm$ 0.08 |
| 54  | (+)-spathulenol                 | 1619            | -                 | -                | -                |

|                               |                                               |      |              |              |              |
|-------------------------------|-----------------------------------------------|------|--------------|--------------|--------------|
| 55                            | (-)-globulol                                  | 1631 | -            | -            | -            |
| 56                            | 220[M+](5) 132(100) 43(96)                    | 1637 | -            | -            | -            |
| 57                            | 202[M+](2) 129(100) 172(72)                   | 1655 | -            | -            | -            |
| 58                            | isospathulenol                                | 1667 | -            | -            | -            |
| 59                            | 218[M+](2) 71(100) 57(93)                     | 1674 | -            | -            | -            |
| 60                            | 220[M+](2) 161(100) 121(39)                   | 1678 | -            | -            | -            |
| 61                            | 218[M+](2) 77(100) 182(33)                    | 1684 | -            | -            | -            |
| 62                            | 220[M+](5) 129(100) 144(92)                   | 1689 | -            | -            | -            |
| 63                            | 220[M+](31) 159(100) 105(81)                  | 1695 | -            | -            | -            |
| 64                            | 202[M+](92) 143(100) 128(78)                  | 1710 | -            | -            | -            |
| 65                            | 220[M+](11) 109(100) 121(51)                  | 1722 | -            | -            | -            |
| 66                            | 220[M+](13) 159(100) 145(89)                  | 1744 | -            | -            | -            |
| 67                            | 220[M+](6) 161(100) 105(73)                   | -    | -            | -            | -            |
| 68                            | 4-(cyclopent-1-enyl)benzoic acid methyl ester | 1784 | 27.22 ± 0.04 | 26.09 ± 0.04 | 19.45 ± 0.05 |
| 69                            | 216[M+](10) 202(100) 159(96)                  | 1791 | -            | -            | -            |
| 70                            | 216[M+](3) 202(100) 143(81)                   | 1795 | -            | -            | -            |
| 71                            | germacra-4(15),5,10(14)-trien-1- $\alpha$ -ol | 1801 | -            | -            | -            |
| 72                            | 1,4-dimethyl-7-(1-methylethyl)-azulene        | 1823 | -            | -            | -            |
| 73                            | methyl 2-methylazulene-1-carboxylate          | 2025 | 1.02 ± 0.02  | 1.48 ± 0.05  | 1.48 ± 0.02  |
| Total                         |                                               |      | 91.48 ± 0.37 | 94.96 ± 0.39 | 98.29 ± 0.33 |
| % Identified                  |                                               |      | 89.97 ± 0.30 | 93.23 ± 0.31 | 96.84 ± 0.27 |
| Including:                    |                                               |      |              |              |              |
| Aliphatics                    |                                               |      | -            | -            | -            |
| Aromatics                     |                                               |      | 27.22 ± 0.04 | 26.09 ± 0.04 | 19.45 ± 0.05 |
| Monoterpene hydrocarbons      |                                               |      | -            | -            | -            |
| Monoterpenoide hydrocarbons   |                                               |      | -            | -            | -            |
| Sesquiterpene hydrocarbons    |                                               |      | 61.73 ± 0.24 | 65.66 ± 0.22 | 75.91 ± 0.20 |
| Sesquiterpenoide hydrocarbons |                                               |      | 1.02 ± 0.02  | 1.48 ± 0.05  | 1.48 ± 0.02  |

<sup>a</sup> Retention index on Quadex 007-5MS column. <sup>b</sup> For abbreviations of samples see Table 1. ± standard deviation

**Table S4.** Volatile compounds detected in the samples extracted by methylene chloride

| No. | Compounds                       | RI <sup>a</sup> | Code <sup>b</sup> |                  |                  |
|-----|---------------------------------|-----------------|-------------------|------------------|------------------|
|     |                                 |                 | SLE3-1            | SLE3-2           | SLE3-3           |
| 1   | pentanal                        | <700            | -                 | -                | -                |
| 2   | 3-methyl-1-butanol              | 768             | -                 | -                | -                |
| 3   | hexanal                         | 834             | -                 | -                | -                |
| 4   | 107[M+](8) 91(100) 106(58)      | 902             | -                 | -                | -                |
| 5   | $\alpha$ -pinene                | 952             | -                 | -                | -                |
| 6   | $\beta$ -pinene                 | 1004            | -                 | -                | -                |
| 7   | limonene                        | 1048            | -                 | -                | -                |
| 8   | benzeneacetaldehyde             | 1093            | -                 | -                | -                |
| 9   | 1-octen-3-yl-acetate            | 1123            | -                 | -                | -                |
| 10  | benzeneethanol                  | 1156            | -                 | -                | -                |
| 11  | 160[M+](49) 145(100) 117(34)    | 1224            | 0.88 $\pm$ 0.03   | 0.95 $\pm$ 0.03  | 0.96 $\pm$ 0.03  |
| 12  | $\beta$ -cyclocitral            | 1257            | -                 | -                | -                |
| 13  | 1,2-dihydro-6-methylnaphthalene | 1295            | -                 | -                | -                |
| 14  | 207[M+](18) 121(100) 93(71)     | 1332            | -                 | -                | -                |
| 15  | $\delta$ -elemene               | 1344            | -                 | -                | -                |
| 16  | methylnaphthalene               | 1359            | -                 | -                | -                |
| 17  | 202[M+](18) 81(100) 96(83)      | 1364            | -                 | -                | -                |
| 18  | anastreptene                    | 1379            | 8.82 $\pm$ 0.04   | 10.01 $\pm$ 0.04 | 10.74 $\pm$ 0.04 |
| 19  | 204[M+](25) 105(100) 161(83)    | 1382            | -                 | -                | -                |
| 20  | 202[M+](5) 159(100) 91(95)      | 1387            | -                 | -                | -                |
| 21  | 202[M+](5) 143(100) 128(92)     | 1392            | 0.82 $\pm$ 0.03   | 0.85 $\pm$ 0.03  | 0.85 $\pm$ 0.02  |
| 22  | $\beta$ -elemene                | 1405            | -                 | -                | -                |
| 23  | 202[M+](2) 143(100) 128(93)     | 1418            | -                 | -                | -                |
| 24  | $\alpha$ -gurjunene             | 1423            | -                 | -                | -                |
| 25  | 202[M+](2) 145(100) 160(35)     | 1426            | -                 | -                | -                |
| 26  | $\beta$ -gurjunene              | 1431            | -                 | -                | -                |
| 27  | 204[M+](12) 159(100) 105(95)    | 1436            | -                 | -                | -                |
| 28  | (-)-aristolene                  | 1439            | -                 | -                | -                |
| 29  | $\gamma$ -gurjunene             | 1444            | -                 | -                | -                |
| 30  | $\gamma$ -maaliene              | 1449            | -                 | -                | -                |
| 31  | $\alpha$ -maaliene              | 1455            | -                 | -                | -                |
| 32  | alloaromadendrene               | 1459            | -                 | -                | -                |
| 33  | selina-5,11-diene               | 1470            | -                 | -                | -                |
| 34  | 202(20)[M]+ 105(100) 159(68)    | 1475            | -                 | -                | -                |
| 35  | 202(30)[M]+ 159(100) 131(75)    | 1479            | -                 | -                | -                |
| 36  | dehydroaromadendrene            | 1482            | 10.23 $\pm$ 0.04  | 12.47 $\pm$ 0.04 | 12.68 $\pm$ 0.04 |
| 37  | 204[M+](1) 142(100) 141(78)     | 1495            | -                 | -                | -                |
| 38  | $\beta$ -guaiene                | 1505            | -                 | -                | -                |
| 39  | germacrene D                    | 1510            | -                 | -                | -                |
| 40  | ledene                          | 1516            | -                 | -                | -                |
| 41  | bicyclogermacrene               | 1521            | -                 | -                | -                |
| 42  | 220[M+](5) 148(100) 133(95)     | 1525            | -                 | -                | -                |
| 43  | cuparene                        | 1538            | -                 | -                | -                |
| 44  | 204[M+](22) 93(100) 105(68)     | 1543            | -                 | -                | -                |
| 45  | 202[M+](12) 157(100) 142(62)    | 1554            | -                 | -                | -                |
| 46  | 204[M+](18) 155(100) 119(82)    | 1558            | -                 | -                | -                |
| 47  | 200[M]+ (72) 143(100) 129(93)   | 1571            | -                 | -                | -                |
| 48  | 200[M+](73) 143(100) 157(97)    | 1579            | -                 | -                | -                |
| 49  | nerolidol                       | 1586            | 0.56 $\pm$ 0.05   | 0.35 $\pm$ 0.03  | 0.31 $\pm$ 0.03  |
| 50  | cadina-3,9-diene                | 1591            | -                 | -                | -                |
| 51  | 4,5,9,10-dehydro-isolongifolene | 1592            | -                 | -                | -                |
| 52  | maaliol                         | 1609            | -                 | -                | -                |
| 53  | 1,4-dimethyl-azulene            | 1616            | 55.18 $\pm$ 0.08  | 50.69 $\pm$ 0.08 | 47.04 $\pm$ 0.08 |
| 54  | (+)-spathulenol                 | 1619            | -                 | -                | -                |

|                              |                                               |      |              |              |              |
|------------------------------|-----------------------------------------------|------|--------------|--------------|--------------|
| 55                           | (-)-globulol                                  | 1631 | -            | -            | -            |
| 56                           | 220[M+](5) 132(100) 43(96)                    | 1637 | -            | -            | -            |
| 57                           | 202[M+](2) 129(100) 172(72)                   | 1655 | -            | -            | -            |
| 58                           | isospathulenol                                | 1667 | -            | -            | -            |
| 59                           | 218[M+](2) 71(100) 57(93)                     | 1674 | -            | -            | -            |
| 60                           | 220[M+](2) 161(100) 121(39)                   | 1678 | -            | -            | -            |
| 61                           | 218[M+](2) 77(100) 182(33)                    | 1684 | -            | -            | -            |
| 62                           | 220[M+](5) 129(100) 144(92)                   | 1689 | -            | -            | -            |
| 63                           | 220[M+](31) 159(100) 105(81)                  | 1695 | -            | -            | -            |
| 64                           | 202[M+](92) 143(100) 128(78)                  | 1710 | -            | -            | -            |
| 65                           | 220[M+](11) 109(100) 121(51)                  | 1722 | -            | -            | -            |
| 66                           | 220[M+](13) 159(100) 145(89)                  | 1744 | -            | -            | -            |
| 67                           | 220[M+](6) 161(100) 105(73)                   | -    | -            | -            | -            |
| 68                           | 4-(cyclopent-1-enyl)benzoic acid methyl ester | 1784 | 18.51 ± 0.04 | 18.75 ± 0.04 | 20.79 ± 0.04 |
| 69                           | 216[M+](10) 202(100) 159(96)                  | 1791 | -            | -            | -            |
| 70                           | 216[M+](3) 202(100) 143(81)                   | 1795 | -            | -            | -            |
| 71                           | germacra-4(15),5,10(14)-trien-1- $\alpha$ -ol | 1801 | -            | -            | -            |
| 72                           | 1,4-dimethyl-7-(1-methylethyl)-azulene        | 1823 | -            | 2.44 ± 0.02  | 2.44 ± 0.03  |
| 73                           | methyl 2-methylazulene-1-carboxylate          | 2025 | 1.97 ± 0.03  | 2.10 ± 0.02  | 2.39 ± 0.02  |
| Total                        |                                               |      | 96.97 ± 0.34 | 98.61 ± 0.35 | 98.20 ± 0.33 |
| % Identified                 |                                               |      | 95.27 ± 0.28 | 96.81 ± 0.29 | 96.39 ± 0.28 |
| Including:                   |                                               |      |              |              |              |
| Aliphatics                   |                                               |      | -            | -            | -            |
| Aromatics                    |                                               |      | 18.51 ± 0.04 | 18.75 ± 0.04 | 20.79 ± 0.04 |
| Monoterpene hydrocarbons     |                                               |      | -            | -            | -            |
| Monoterpenoid hydrocarbons   |                                               |      | -            | -            | -            |
| Sesquiterpene hydrocarbons   |                                               |      | 74.23 ± 0.16 | 75.61 ± 0.20 | 72.90 ± 0.19 |
| Sesquiterpenoid hydrocarbons |                                               |      | 2.53 ± 0.08  | 2.45 ± 0.05  | 2.70 ± 0.05  |

<sup>a</sup> Retention index on Quadex 007-5MS column. <sup>b</sup> For abbreviations of samples see Table 1.  $\pm$  standard deviation



**Table S5.** Volatile compounds detected in the samples extracted by ethyl acetate

| No. | Compounds                       | RI <sup>a</sup> | Code <sup>b</sup> |                  |                  |
|-----|---------------------------------|-----------------|-------------------|------------------|------------------|
|     |                                 |                 | SLE4-1            | SLE4-2           | SLE4-3           |
| 1   | pentanal                        | <700            | -                 | -                | -                |
| 2   | 3-methyl-1-butanol              | 768             | -                 | -                | -                |
| 3   | hexanal                         | 834             | -                 | -                | -                |
| 4   | 107[M+](8) 91(100) 106(58)      | 902             | -                 | -                | -                |
| 5   | $\alpha$ -pinene                | 952             | -                 | -                | -                |
| 6   | $\beta$ -pinene                 | 1004            | -                 | -                | -                |
| 7   | limonene                        | 1048            | -                 | -                | -                |
| 8   | benzeneacetaldehyde             | 1093            | -                 | -                | -                |
| 9   | 1-octen-3-yl-acetate            | 1123            | -                 | -                | -                |
| 10  | benzeneethanol                  | 1156            | 0.09 $\pm$ 0.02   | 0.11 $\pm$ 0.02  | 0.18 $\pm$ 0.03  |
| 11  | 160[M+](49) 145(100) 117(34)    | 1224            | 1.12 $\pm$ 0.03   | 1.14 $\pm$ 0.03  | 1.18 $\pm$ 0.02  |
| 12  | $\beta$ -cyclocitral            | 1257            | 0.09 $\pm$ 0.01   | 0.11 $\pm$ 0.02  | 0.17 $\pm$ 0.02  |
| 13  | 1,2-dihydro-6-methylnaphthalene | 1295            | -                 | -                | -                |
| 14  | 207[M+](18) 121(100) 93(71)     | 1332            | -                 | -                | -                |
| 15  | $\delta$ -elemene               | 1344            | -                 | -                | -                |
| 16  | methylnaphthalene               | 1359            | -                 | -                | -                |
| 17  | 202[M+](18) 81(100) 96(83)      | 1364            | -                 | -                | -                |
| 18  | anastreptene                    | 1379            | 7.00 $\pm$ 0.03   | 7.84 $\pm$ 0.03  | 7.85 $\pm$ 0.03  |
| 19  | 204[M+](25) 105(100) 161(83)    | 1382            | -                 | -                | -                |
| 20  | 202[M+](5) 159(100) 91(95)      | 1387            | -                 | -                | -                |
| 21  | 202[M+](5) 143(100) 128(92)     | 1392            | 0.14 $\pm$ 0.02   | 0.16 $\pm$ 0.02  | 0.16 $\pm$ 0.02  |
| 22  | $\beta$ -elemene                | 1405            | -                 | -                | -                |
| 23  | 202[M+](2) 143(100) 128(93)     | 1418            | -                 | -                | -                |
| 24  | $\alpha$ -gurjunene             | 1423            | -                 | -                | -                |
| 25  | 202[M+](2) 145(100) 160(35)     | 1426            | -                 | -                | -                |
| 26  | $\beta$ -gurjunene              | 1431            | -                 | -                | -                |
| 27  | 204[M+](12) 159(100) 105(95)    | 1436            | -                 | -                | -                |
| 28  | (-)-aristolene                  | 1439            | -                 | -                | -                |
| 29  | $\gamma$ -gurjunene             | 1444            | -                 | -                | -                |
| 30  | $\gamma$ -maaliene              | 1449            | -                 | -                | -                |
| 31  | $\alpha$ -maaliene              | 1455            | -                 | -                | -                |
| 32  | alloaromadendrene               | 1459            | -                 | -                | -                |
| 33  | selina-5,11-diene               | 1470            | -                 | -                | -                |
| 34  | 202(20)[M]+ 105(100) 159(68)    | 1475            | -                 | -                | -                |
| 35  | 202(30)[M]+ 159(100) 131(75)    | 1479            | -                 | -                | 0.29 $\pm$ 0.03  |
| 36  | dehydroaromadendrene            | 1482            | -                 | -                | -                |
| 37  | 204[M+](1) 142(100) 141(78)     | 1495            | -                 | -                | -                |
| 38  | $\beta$ -guaiene                | 1505            | -                 | -                | -                |
| 39  | germacrene D                    | 1510            | -                 | -                | -                |
| 40  | ledene                          | 1516            | -                 | -                | -                |
| 41  | bicyclogermacrene               | 1521            | 7.32 $\pm$ 0.03   | 10.88 $\pm$ 0.03 | 12.24 $\pm$ 0.02 |
| 42  | 220[M+](5) 148(100) 133(95)     | 1525            | -                 | -                | -                |
| 43  | cuparene                        | 1538            | -                 | -                | -                |
| 44  | 204[M+](22) 93(100) 105(68)     | 1543            | -                 | -                | -                |
| 45  | 202[M+](12) 157(100) 142(62)    | 1554            | -                 | -                | -                |
| 46  | 204[M+](18) 155(100) 119(82)    | 1558            | -                 | -                | -                |
| 47  | 200[M]+ (72) 143(100) 129(93)   | 1571            | -                 | -                | -                |
| 48  | 200[M+](73) 143(100) 157(97)    | 1579            | -                 | -                | -                |
| 49  | nerolidol                       | 1586            | 0.56 $\pm$ 0.05   | 0.12 $\pm$ 0.01  | 0.12 $\pm$ 0.01  |
| 50  | cadina-3,9-diene                | 1591            | -                 | -                | -                |
| 51  | 4,5,9,10-dehydro-isolongifolene | 1592            | 0.56 $\pm$ 0.02   | 0.70 $\pm$ 0.03  | 0.70 $\pm$ 0.02  |
| 52  | maaliol                         | 1609            | -                 | -                | -                |
| 53  | 1,4-dimethyl-azulene            | 1616            | 39.94 $\pm$ 0.06  | 36.01 $\pm$ 0.06 | 35.99 $\pm$ 0.06 |
| 54  | (+)-spathulenol                 | 1619            | -                 | -                | -                |

|                               |                                               |      |              |              |              |
|-------------------------------|-----------------------------------------------|------|--------------|--------------|--------------|
| 55                            | (-)-globulol                                  | 1631 | -            | -            | -            |
| 56                            | 220[M+](5) 132(100) 43(96)                    | 1637 | 0.47 ± 0.03  | 0.40 ± 0.03  | 0.39 ± 0.03  |
| 57                            | 202[M+](2) 129(100) 172(72)                   | 1655 | 1.23 ± 0.02  | 1.14 ± 0.02  | 0.98 ± 0.03  |
| 58                            | isospathulenol                                | 1667 | -            | -            | -            |
| 59                            | 218[M+](2) 71(100) 57(93)                     | 1674 | -            | -            | -            |
| 60                            | 220[M+](2) 161(100) 121(39)                   | 1678 | -            | -            | -            |
| 61                            | 218[M+](2) 77(100) 182(33)                    | 1684 | -            | -            | -            |
| 62                            | 220[M+](5) 129(100) 144(92)                   | 1689 | -            | -            | -            |
| 63                            | 220[M+](31) 159(100) 105(81)                  | 1695 | -            | -            | -            |
| 64                            | 202[M+](92) 143(100) 128(78)                  | 1710 | -            | -            | -            |
| 65                            | 220[M+](11) 109(100) 121(51)                  | 1722 | -            | 0.40 ± 0.04  | 0.73 ± 0.02  |
| 66                            | 220[M+](13) 159(100) 145(89)                  | 1744 | -            | -            | -            |
| 67                            | 220[M+](6) 161(100) 105(73)                   | -    | -            | -            | -            |
| 68                            | 4-(cyclopent-1-enyl)benzoic acid methyl ester | 1784 | 37.68 ± 0.04 | 35.66 ± 0.04 | 30.82 ± 0.04 |
| 69                            | 216[M+](10) 202(100) 159(96)                  | 1791 | -            | -            | -            |
| 70                            | 216[M+](3) 202(100) 143(81)                   | 1795 | -            | -            | -            |
| 71                            | germacra-4(15),5,10(14)-trien-1- $\alpha$ -ol | 1801 | 0.56 ± 0.03  | 0.73 ± 0.03  | 0.85 ± 0.03  |
| 72                            | 1,4-dimethyl-7-(1-methylethyl)-azulene        | 1823 | -            | -            | -            |
| 73                            | methyl 2-methylazulene-1-carboxylate          | 2025 | 1.61 ± 0.02  | 3.45 ± 0.04  | 3.45 ± 0.03  |
| Total                         |                                               |      | 97.81 ± 0.36 | 99.14 ± 0.43 | 96.10 ± 0.48 |
| % Identified                  |                                               |      | 94.85 ± 0.26 | 95.61 ± 0.31 | 92.37 ± 0.31 |
| Including:                    |                                               |      |              |              |              |
| Aliphatics                    |                                               |      | -            | -            | -            |
| Aromatics                     |                                               |      | 37.77 ± 0.06 | 35.77 ± 0.06 | 31.00 ± 0.07 |
| Monoterpene hydrocarbons      |                                               |      | -            | -            | -            |
| Monoterpenoide hydrocarbons   |                                               |      | 0.09 ± 0.01  | 0.11 ± 0.02  | 0.17 ± 0.02  |
| Sesquiterpene hydrocarbons    |                                               |      | 55.38 ± 0.17 | 56.16 ± 0.18 | 57.63 ± 0.16 |
| Sesquiterpenoide hydrocarbons |                                               |      | 1.61 ± 0.02  | 3.57 ± 0.05  | 3.57 ± 0.06  |

<sup>a</sup> Retention index on Quadex 007-5MS column. <sup>b</sup> For abbreviations of samples see Table 1.  $\pm$  standard deviation

**Table S6.** Volatile compounds detected in the samples extracted by methanol

| No. | Compounds                       | RI <sup>a</sup> | Code <sup>b</sup> |                  |                  |
|-----|---------------------------------|-----------------|-------------------|------------------|------------------|
|     |                                 |                 | SLE5-1            | SLE5-2           | SLE5-3           |
| 1   | pentanal                        | <700            | -                 | -                | -                |
| 2   | 3-methyl-1-butanol              | 768             | -                 | -                | -                |
| 3   | hexanal                         | 834             | -                 | -                | -                |
| 4   | 107[M+](8) 91(100) 106(58)      | 902             | -                 | -                | -                |
| 5   | $\alpha$ -pinene                | 952             | -                 | -                | -                |
| 6   | $\beta$ -pinene                 | 1004            | -                 | -                | -                |
| 7   | limonene                        | 1048            | -                 | -                | -                |
| 8   | benzeneacetaldehyde             | 1093            | -                 | -                | -                |
| 9   | 1-octen-3-yl-acetate            | 1123            | -                 | -                | -                |
| 10  | benzeneethanol                  | 1156            | -                 | -                | -                |
| 11  | 160[M+](49) 145(100) 117(34)    | 1224            | 0.49 $\pm$ 0.03   | 0.78 $\pm$ 0.02  | 0.78 $\pm$ 0.02  |
| 12  | $\beta$ -cyclocitral            | 1257            | -                 | -                | -                |
| 13  | 1,2-dihydro-6-methylnaphthalene | 1295            | -                 | -                | -                |
| 14  | 207[M+](18) 121(100) 93(71)     | 1332            | -                 | -                | -                |
| 15  | $\delta$ -elemene               | 1344            | -                 | -                | -                |
| 16  | methylnaphthalene               | 1359            | -                 | -                | -                |
| 17  | 202[M+](18) 81(100) 96(83)      | 1364            | -                 | -                | -                |
| 18  | anastreptene                    | 1379            | 11.37 $\pm$ 0.03  | 13.16 $\pm$ 0.03 | 13.16 $\pm$ 0.03 |
| 19  | 204[M+](25) 105(100) 161(83)    | 1382            | -                 | -                | -                |
| 20  | 202[M+](5) 159(100) 91(95)      | 1387            | -                 | -                | -                |
| 21  | 202[M+](5) 143(100) 128(92)     | 1392            | 0.99 $\pm$ 0.02   | 1.11 $\pm$ 0.03  | 1.11 $\pm$ 0.02  |
| 22  | $\beta$ -elemene                | 1405            | -                 | -                | -                |
| 23  | 202[M+](2) 143(100) 128(93)     | 1418            | -                 | -                | -                |
| 24  | $\alpha$ -gurjunene             | 1423            | -                 | -                | -                |
| 25  | 202[M+](2) 145(100) 160(35)     | 1426            | -                 | -                | -                |
| 26  | $\beta$ -gurjunene              | 1431            | -                 | -                | -                |
| 27  | 204[M+](12) 159(100) 105(95)    | 1436            | -                 | -                | -                |
| 28  | (-)-aristolene                  | 1439            | -                 | -                | -                |
| 29  | $\gamma$ -gurjunene             | 1444            | -                 | -                | -                |
| 30  | $\gamma$ -maaliene              | 1449            | -                 | -                | -                |
| 31  | $\alpha$ -maaliene              | 1455            | -                 | -                | -                |
| 32  | alloaromadendrene               | 1459            | -                 | -                | -                |
| 33  | selina-5,11-diene               | 1470            | -                 | -                | -                |
| 34  | 202(20)[M]+ 105(100) 159(68)    | 1475            | -                 | -                | -                |
| 35  | 202(30)[M]+ 159(100) 131(75)    | 1479            | 0.28 $\pm$ 0.02   | 0.33 $\pm$ 0.02  | 0.33 $\pm$ 0.02  |
| 36  | dehydroaromadendrene            | 1482            | 0.30 $\pm$ 0.03   | 0.38 $\pm$ 0.02  | 0.53 $\pm$ 0.02  |
| 37  | 204[M+](1) 142(100) 141(78)     | 1495            | -                 | -                | -                |
| 38  | $\beta$ -guaiene                | 1505            | -                 | 0.48 $\pm$ 0.02  | 0.48 $\pm$ 0.02  |
| 39  | germacrene D                    | 1510            | -                 | -                | -                |
| 40  | ledene                          | 1516            | -                 | -                | -                |
| 41  | bicyclogermacrene               | 1521            | 16.05 $\pm$ 0.03  | 16.87 $\pm$ 0.03 | 16.87 $\pm$ 0.03 |
| 42  | 220[M+](5) 148(100) 133(95)     | 1525            | -                 | -                | -                |
| 43  | cuparene                        | 1538            | -                 | -                | -                |
| 44  | 204[M+](22) 93(100) 105(68)     | 1543            | -                 | -                | -                |
| 45  | 202[M+](12) 157(100) 142(62)    | 1554            | -                 | -                | -                |
| 46  | 204[M+](18) 155(100) 119(82)    | 1558            | -                 | -                | -                |
| 47  | 200[M+](72) 143(100) 129(93)    | 1571            | -                 | -                | -                |
| 48  | 200[M+](73) 143(100) 157(97)    | 1579            | -                 | -                | -                |
| 49  | nerolidol                       | 1586            | -                 | -                | -                |
| 50  | cadina-3,9-diene                | 1591            | -                 | -                | -                |
| 51  | 4,5,9,10-dehydro-isolongifolene | 1592            | 0.17 $\pm$ 0.02   | 0.15 $\pm$ 0.02  | 0.12 $\pm$ 0.02  |
| 52  | maaliol                         | 1609            | -                 | -                | -                |
| 53  | 1,4-dimethyl-azulene            | 1616            | 44.75 $\pm$ 0.07  | 45.68 $\pm$ 0.07 | 45.70 $\pm$ 0.06 |
| 54  | (+)-spathulenol                 | 1619            | -                 | -                | -                |

|                              |                                               |      |              |              |              |
|------------------------------|-----------------------------------------------|------|--------------|--------------|--------------|
| 55                           | (-)-globulol                                  | 1631 | -            | -            | -            |
| 56                           | 220[M+](5) 132(100) 43(96)                    | 1637 | -            | -            | -            |
| 57                           | 202[M+](2) 129(100) 172(72)                   | 1655 | -            | -            | -            |
| 58                           | isospathulenol                                | 1667 | -            | -            | -            |
| 59                           | 218[M+](2) 71(100) 57(93)                     | 1674 | -            | -            | -            |
| 60                           | 220[M+](2) 161(100) 121(39)                   | 1678 | -            | -            | -            |
| 61                           | 218[M+](2) 77(100) 182(33)                    | 1684 | -            | -            | -            |
| 62                           | 220[M+](5) 129(100) 144(92)                   | 1689 | -            | -            | -            |
| 63                           | 220[M+](31) 159(100) 105(81)                  | 1695 | -            | -            | -            |
| 64                           | 202[M+](92) 143(100) 128(78)                  | 1710 | -            | -            | -            |
| 65                           | 220[M+](11) 109(100) 121(51)                  | 1722 | -            | -            | -            |
| 66                           | 220[M+](13) 159(100) 145(89)                  | 1744 | -            | -            | -            |
| 67                           | 220[M+](6) 161(100) 105(73)                   | -    | -            | -            | -            |
| 68                           | 4-(cyclopent-1-enyl)benzoic acid methyl ester | 1784 | 20.13 ± 0.04 | 16.30 ± 0.04 | 16.30 ± 0.03 |
| 69                           | 216[M+](10) 202(100) 159(96)                  | 1791 | -            | -            | -            |
| 70                           | 216[M+](3) 202(100) 143(81)                   | 1795 | -            | -            | -            |
| 71                           | germacra-4(15),5,10(14)-trien-1- $\alpha$ -ol | 1801 | -            | -            | -            |
| 72                           | 1,4-dimethyl-7-(1-methylethyl)-azulene        | 1823 | -            | 1.21 ± 0.02  | 1.21 ± 0.02  |
| 73                           | methyl 2-methylazulene-1-carboxylate          | 2025 | 1.77 ± 0.03  | 1.18 ± 0.03  | 2.69 ± 0.02  |
| Total                        |                                               |      | 96.30 ± 0.32 | 97.63 ± 0.36 | 99.28 ± 0.31 |
| % Identified                 |                                               |      | 94.54 ± 0.25 | 95.41 ± 0.29 | 95.40 ± 0.25 |
| Including:                   |                                               |      |              |              |              |
| Aliphatics                   |                                               |      | -            | -            | -            |
| Aromatics                    |                                               |      | 20.13 ± 0.04 | 16.30 ± 0.04 | 16.30 ± 0.03 |
| Monoterpene hydrocarbons     |                                               |      | -            | -            | -            |
| Monoterpenoid hydrocarbons   |                                               |      | -            | -            | -            |
| Sesquiterpene hydrocarbons   |                                               |      | 72.64 ± 0.18 | 77.93 ± 0.22 | 78.07 ± 0.20 |
| Sesquiterpenoid hydrocarbons |                                               |      | 1.77 ± 0.03  | 1.18 ± 0.03  | 2.69 ± 0.02  |

<sup>a</sup> Retention index on Quadex 007-5MS column. <sup>b</sup> For abbreviations of samples see Table 1. ± standard deviation

**Table S7.** Volatile compounds detected in the samples analysed by MAE

| No. | Compounds                       | RI <sup>a</sup> | Code <sup>b</sup> |                  |                 |                 |
|-----|---------------------------------|-----------------|-------------------|------------------|-----------------|-----------------|
|     |                                 |                 | MAE1              | MAE2             | MAE3            | MAE4            |
| 1   | pentanal                        | <700            | -                 | -                | -               | -               |
| 2   | 3-methyl-1-butanol              | 768             | -                 | -                | -               | -               |
| 3   | hexanal                         | 834             | -                 | -                | -               | -               |
| 4   | 107[M+](8) 91(100) 106(58)      | 902             | -                 | -                | -               | -               |
| 5   | $\alpha$ -pinene                | 952             | -                 | -                | -               | -               |
| 6   | $\beta$ -pinene                 | 1004            | -                 | -                | -               | -               |
| 7   | limonene                        | 1048            | -                 | -                | -               | -               |
| 8   | benzeneacetaldehyde             | 1093            | 0.20 $\pm$ 0.02   | 0.12 $\pm$ 0.02  | 0.10 $\pm$ 0.02 | 0.11 $\pm$ 0.03 |
| 9   | 1-octen-3-yl-acetate            | 1123            | 0.07 $\pm$ 0.02   | 0.06 $\pm$ 0.01  | 0.06 $\pm$ 0.01 | 0.04 $\pm$ 0.01 |
| 10  | benzeneethanol                  | 1156            | -                 | -                | 0.08 $\pm$ 0.02 | -               |
| 11  | 160[M+](49) 145(100) 117(34)    | 1224            | 0.13 $\pm$ 0.03   | 0.65 $\pm$ 0.03  | 0.09 $\pm$ 0.02 | 0.22 $\pm$ 0.03 |
| 12  | $\beta$ -cyclocitral            | 1257            | 0.11 $\pm$ 0.02   | 0.08 $\pm$ 0.01  | 0.07 $\pm$ 0.02 | -               |
| 13  | 1,2-dihydro-6-methylnaphthalene | 1295            | -                 | -                | -               | -               |
| 14  | 207[M+](18) 121(100) 93(71)     | 1332            | -                 | -                | -               | -               |
| 15  | $\delta$ -elemene               | 1344            | -                 | -                | -               | -               |
| 16  | methylnaphthalene               | 1359            | -                 | -                | -               | -               |
| 17  | 202[M+](18) 81(100) 96(83)      | 1364            | 0.04 $\pm$ 0.01   | 0.02 $\pm$ 0.01  | -               | 0.02 $\pm$ 0.01 |
| 18  | anastreptene                    | 1379            | 7.74 $\pm$ 0.03   | 7.24 $\pm$ 0.04  | 6.12 $\pm$ 0.04 | 5.98 $\pm$ 0.03 |
| 19  | 204[M+](25) 105(100) 161(83)    | 1382            | -                 | -                | -               | -               |
| 20  | 202[M+](5) 159(100) 91(95)      | 1387            | -                 | -                | -               | -               |
| 21  | 202[M+](5) 143(100) 128(92)     | 1392            | -                 | -                | 0.11 $\pm$ 0.02 | -               |
| 22  | $\beta$ -elemene                | 1405            | -                 | -                | -               | -               |
| 23  | 202[M+](2) 143(100) 128(93)     | 1418            | -                 | -                | -               | -               |
| 24  | $\alpha$ -gurjunene             | 1423            | -                 | -                | -               | -               |
| 25  | 202[M+](2) 145(100) 160(35)     | 1426            | -                 | -                | -               | -               |
| 26  | $\beta$ -gurjunene              | 1431            | -                 | -                | -               | -               |
| 27  | 204[M+](12) 159(100) 105(95)    | 1436            | -                 | -                | -               | -               |
| 28  | (-)-aristolene                  | 1439            | -                 | -                | -               | -               |
| 29  | $\gamma$ -gurjunene             | 1444            | -                 | -                | -               | -               |
| 30  | $\gamma$ -maaliene              | 1449            | -                 | -                | -               | -               |
| 31  | $\alpha$ -maaliene              | 1455            | -                 | -                | -               | -               |
| 32  | alloaromadendrene               | 1459            | -                 | -                | -               | -               |
| 33  | selina-5,11-diene               | 1470            | -                 | -                | -               | -               |
| 34  | 202(20)[M]+ 105(100) 159(68)    | 1475            | -                 | -                | -               | -               |
| 35  | 202(30)[M]+ 159(100) 131(75)    | 1479            | -                 | -                | -               | 0.11 $\pm$ 0.02 |
| 36  | dehydroaromadendrene            | 1482            | 0.56 $\pm$ 0.02   | 11.12 $\pm$ 0.04 | 0.44 $\pm$ 0.03 | 0.11 $\pm$ 0.02 |
| 37  | 204[M+](1) 142(100) 141(78)     | 1495            | 0.14 $\pm$ 0.02   | 0.10 $\pm$ 0.02  | 0.12 $\pm$ 0.02 | 0.09 $\pm$ 0.03 |
| 38  | $\beta$ -guaiene                | 1505            | -                 | -                | -               | -               |
| 39  | germacrene D                    | 1510            | 0.06 $\pm$ 0.01   | 0.03 $\pm$ 0.01  | -               | -               |
| 40  | ledene                          | 1516            | -                 | -                | -               | -               |
| 41  | bicyclogermacrene               | 1521            | 7.95 $\pm$ 0.03   | -                | 6.48 $\pm$ 0.04 | 7.32 $\pm$ 0.03 |
| 42  | 220[M+](5) 148(100) 133(95)     | 1525            | -                 | -                | -               | -               |
| 43  | cuparene                        | 1538            | 0.14 $\pm$ 0.02   | 0.12 $\pm$ 0.04  | -               | 0.09 $\pm$ 0.02 |
| 44  | 204[M+](22) 93(100) 105(68)     | 1543            | -                 | -                | -               | -               |
| 45  | 202[M+](12) 157(100) 142(62)    | 1554            | -                 | -                | -               | -               |
| 46  | 204[M+](18) 155(100) 119(82)    | 1558            | -                 | -                | -               | -               |
| 47  | 200[M+](72) 143(100) 129(93)    | 1571            | -                 | -                | -               | -               |
| 48  | 200[M+](73) 143(100) 157(97)    | 1579            | -                 | -                | -               | -               |
| 49  | nerolidol                       | 1586            | -                 | 0.32 $\pm$ 0.03  | -               | -               |
| 50  | cadina-3,9-diene                | 1591            | -                 | -                | -               | -               |
| 51  | 4,5,9,10-dehydro-isolongifolene | 1592            | 0.15 $\pm$ 0.02   | -                | 0.54 $\pm$ 0.03 | 0.11 $\pm$ 0.02 |
| 52  | maaliol                         | 1609            | -                 | -                | -               | -               |
| 53  | 1,4-dimethyl-azulene            | 1616            | 0.25 $\pm$ 0.02   | 0.89 $\pm$ 0.04  | 0.22 $\pm$ 0.02 | 0.12 $\pm$ 0.02 |
| 54  | (+)-spathulenol                 | 1619            | 1.53 $\pm$ 0.02   | -                | -               | -               |

|                               |                                               |      |              |              |              |              |
|-------------------------------|-----------------------------------------------|------|--------------|--------------|--------------|--------------|
| 55                            | (-)-globulol                                  | 1631 | -            | -            | -            | -            |
| 56                            | 220[M+](5) 132(100) 43(96)                    | 1637 | 1.00 ± 0.03  | 0.66 ± 0.03  | 0.22 ± 0.03  | 0.07 ± 0.01  |
| 57                            | 202[M+](2) 129(100) 172(72)                   | 1655 | 3.53 ± 0.04  | 5.45 ± 0.04  | 0.09 ± 0.02  | 2.22 ± 0.04  |
| 58                            | isospathulenol                                | 1667 | -            | -            | -            | -            |
| 59                            | 218[M+](2) 71(100) 57(93)                     | 1674 | -            | -            | -            | -            |
| 60                            | 220[M+](2) 161(100) 121(39)                   | 1678 | -            | -            | -            | -            |
| 61                            | 218[M+](2) 77(100) 182(33)                    | 1684 | -            | -            | -            | -            |
| 62                            | 220[M+](5) 129(100) 144(92)                   | 1689 | -            | -            | -            | -            |
| 63                            | 220[M+](31) 159(100) 105(81)                  | 1695 | -            | -            | -            | -            |
| 64                            | 202[M+](92) 143(100) 128(78)                  | 1710 | 25.02 ± 0.04 | 18.17 ± 0.05 | 22.21 ± 0.04 | 21.22 ± 0.03 |
| 65                            | 220[M+](11) 109(100) 121(51)                  | 1722 | 1.44 ± 0.02  | 1.12 ± 0.02  | 0.22 ± 0.02  | 1.12 ± 0.02  |
| 66                            | 220[M+](13) 159(100) 145(89)                  | 1744 | -            | -            | -            | -            |
| 67                            | 220[M+](6) 161(100) 105(73)                   |      | -            | -            | -            | -            |
| 68                            | 4-(cyclopent-1-enyl)benzoic acid methyl ester | 1784 | -            | -            | -            | -            |
| 69                            | 216[M+](10) 202(100) 159(96)                  | 1791 | -            | -            | -            | -            |
| 70                            | 216[M+](3) 202(100) 143(81)                   | 1795 | -            | -            | -            | -            |
| 71                            | germacra-4(15),5,10(14)-trien-1- $\alpha$ -ol | 1801 | -            | -            | 0.22 ± 0.03  | -            |
| 72                            | 1,4-dimethyl-7-(1-methylethyl)-azulene        | 1823 | -            | -            | -            | -            |
| 73                            | methyl 2-methylazulene-1-carboxylate          | 2025 | 20.03 ± 0.04 | 18.76 ± 0.04 | 18.23 ± 0.04 | 17.76 ± 0.03 |
| Total                         |                                               |      | 70.09 ± 0.46 | 64.91 ± 0.48 | 55.62 ± 0.47 | 56.71 ± 0.40 |
| % Identified                  |                                               |      | 38.79 ± 0.27 | 38.74 ± 0.28 | 32.56 ± 0.30 | 31.64 ± 0.21 |
| Including:                    |                                               |      |              |              |              |              |
| Aliphatics                    |                                               |      | 0.07 ± 0.02  | 0.06 ± 0.01  | 0.06 ± 0.01  | 0.04 ± 0.01  |
| Aromatics                     |                                               |      | 0.20 ± 0.02  | 0.12 ± 0.02  | 0.18 ± 0.04  | 0.11 ± 0.03  |
| Monoterpene hydrocarbons      |                                               |      | -            | -            | -            | -            |
| Monoterpenoide hydrocarbons   |                                               |      | 0.11 ± 0.02  | 0.08 ± 0.01  | 0.07 ± 0.02  | -            |
| Sesquiterpene hydrocarbons    |                                               |      | 16.85 ± 0.15 | 19.40 ± 0.17 | 14.02 ± 0.19 | 13.73 ± 0.14 |
| Sesquiterpenoide hydrocarbons |                                               |      | 21.56 ± 0.06 | 19.08 ± 0.07 | 18.23 ± 0.04 | 17.76 ± 0.03 |

<sup>a</sup> Retention index on Quadex 007-5MS column. <sup>b</sup> For abbreviations of samples see Table 1.  $\pm$  standard deviation
